# Supplementary material for: The Minimum Methionine Requirement for Adults Aged ≥60 Years Is the Same in Males and Females
Source: MDPI journal article supplement (doi:10.3390/nu15194112), 2023-09-23
Supplement: s1 [file s1]

The minimum methionine requirement of adults  $\geq 60$  years is the same in males and females; Alyssa Paoletti  
“Online Supplementary Material”

**Table S1.** Plasma amino acid concentrations of older adults who participated in the study to determine the minimum methionine requirement of adults  $\geq 60$  y in good health<sup>1</sup>

| Amino Acids <sup>1</sup> , $\mu\text{mol/L}$ | Methionine Intake, mg/kg/d |                            |                             |                           |                           |                           |                           |
|----------------------------------------------|----------------------------|----------------------------|-----------------------------|---------------------------|---------------------------|---------------------------|---------------------------|
|                                              | 0                          | 1                          | 3                           | 8                         | 14                        | 17                        | 20                        |
| Alanine                                      | 622 $\pm$ 69               | 625 $\pm$ 167              | 778 $\pm$ 111               | 722 $\pm$ 149             | 676 $\pm$ 76              | 675 $\pm$ 93              | 698 $\pm$ 71              |
| Arginine                                     | 144 $\pm$ 14               | 145 $\pm$ 37               | 170 $\pm$ 22                | 151 $\pm$ 29              | 154 $\pm$ 16              | 146 $\pm$ 24              | 153 $\pm$ 17              |
| Cysteine <sup>2</sup>                        | 309 $\pm$ 8.0              | 295 $\pm$ 6.8              | 308 $\pm$ 8.8               | 297 $\pm$ 10              | 314 $\pm$ 11              | 304 $\pm$ 11              | 302 $\pm$ 11              |
| Citrulline                                   | 53 $\pm$ 7.4               | 51 $\pm$ 14                | 71 $\pm$ 10                 | 65 $\pm$ 13               | 58 $\pm$ 8.3              | 53 $\pm$ 9.2              | 52 $\pm$ 8.1              |
| Glutamate                                    | 93 $\pm$ 16                | 114 $\pm$ 42               | 105 $\pm$ 15                | 110 $\pm$ 21              | 99 $\pm$ 15               | 79 $\pm$ 11               | 84 $\pm$ 12               |
| Glutamine                                    | 1609 $\pm$ 178             | 1563 $\pm$ 432             | 1988 $\pm$ 256              | 1830 $\pm$ 397            | 1680 $\pm$ 188            | 1686 $\pm$ 240            | 1672 $\pm$ 196            |
| Glycine                                      | 296 $\pm$ 47               | 285 $\pm$ 64               | 405 $\pm$ 54                | 304 $\pm$ 66              | 377 $\pm$ 58              | 308 $\pm$ 45              | 341 $\pm$ 37              |
| Histidine                                    | 114 $\pm$ 12               | 121 $\pm$ 30               | 138 $\pm$ 16                | 129 $\pm$ 25              | 122 $\pm$ 11              | 121 $\pm$ 14              | 132 $\pm$ 13              |
| Isoleucine                                   | 200 $\pm$ 27               | 208 $\pm$ 64               | 214 $\pm$ 36                | 210 $\pm$ 51              | 190 $\pm$ 23              | 170 $\pm$ 29              | 177 $\pm$ 19              |
| Leucine                                      | 254 $\pm$ 37               | 260 $\pm$ 84               | 267 $\pm$ 45                | 261 $\pm$ 67              | 216 $\pm$ 26              | 207 $\pm$ 37              | 198 $\pm$ 26              |
| Lysine                                       | 266 $\pm$ 26               | 268 $\pm$ 69               | 321 $\pm$ 39                | 293 $\pm$ 57              | 271 $\pm$ 29              | 268 $\pm$ 36              | 299 $\pm$ 27              |
| Methionine <sup>2</sup>                      | 6.3 $\pm$ 1.1 <sup>a</sup> | 7.5 $\pm$ 1.4 <sup>a</sup> | 12 $\pm$ 2.1 <sup>a,b</sup> | 18 $\pm$ 1.8 <sup>b</sup> | 29 $\pm$ 4.1 <sup>c</sup> | 30 $\pm$ 2.2 <sup>c</sup> | 34 $\pm$ 1.6 <sup>c</sup> |
| Phenylalanine                                | 131 $\pm$ 14               | 121 $\pm$ 29               | 149 $\pm$ 16                | 133 $\pm$ 25              | 119 $\pm$ 10              | 122 $\pm$ 13              | 141 $\pm$ 9.5             |
| Proline                                      | 294 $\pm$ 40               | 304 $\pm$ 81               | 358 $\pm$ 50                | 329 $\pm$ 64              | 308 $\pm$ 36              | 285 $\pm$ 43              | 309 $\pm$ 34              |
| Serine                                       | 193 $\pm$ 23               | 183 $\pm$ 48               | 250 $\pm$ 36                | 194 $\pm$ 41              | 205 $\pm$ 26              | 189 $\pm$ 32              | 174 $\pm$ 18              |
| Threonine                                    | 204 $\pm$ 24               | 194 $\pm$ 53               | 266 $\pm$ 39                | 223 $\pm$ 44              | 217 $\pm$ 26              | 210 $\pm$ 37              | 219 $\pm$ 28              |
| Tyrosine                                     | 122 $\pm$ 14               | 122 $\pm$ 34               | 133 $\pm$ 16                | 135 $\pm$ 30              | 110 $\pm$ 11              | 109 $\pm$ 15              | 115 $\pm$ 12              |
| Valine                                       | 569 $\pm$ 79               | 565 $\pm$ 145              | 637 $\pm$ 91                | 577 $\pm$ 128             | 560 $\pm$ 59              | 510 $\pm$ 77              | 489 $\pm$ 45              |

|           |            |             |            |             |            |            |            |
|-----------|------------|-------------|------------|-------------|------------|------------|------------|
| Total IAA | 1744 ± 209 | 1744 ± 471  | 2005 ± 268 | 1843 ± 380  | 1724 ± 175 | 1541 ± 233 | 1977 ± 308 |
| Total DAA | 3846 ± 397 | 3778 ± 941  | 4695 ± 549 | 4249 ± 814  | 4094 ± 404 | 3763 ± 512 | 4142 ± 403 |
| Total AA  | 5589 ± 599 | 5522 ± 1407 | 6700 ± 806 | 6092 ± 1184 | 5818 ± 573 | 5304 ± 737 | 6119 ± 685 |

<sup>1</sup>All values are means ± SEM. *n* = 7 females and *n* = 6 males. Amino acid analysis by UPLC (Waters Corporation, Milford, MA). Values with different superscripts were significantly different, *P* < 0.05 determined by joint linear mixed effect model with sex and methionine intake as fixed effect terms and subject as a random effect term. Plasma AA concentrations were unaffected by sex (*P* > 0.05). IAA, indispensable amino acids; NIAA, non-indispensable amino acids.

<sup>2</sup>Methionine and cysteine analyzed using UPLC-MS/MS whereby the MS/MS (Waters Xevo TQS mass spectrometer; Waters Corporation, Milford, MA) is coupled to UPLC (Waters H class UPLC; Waters Corporation, Milford, MA). The University of British Columbia.
